# Supplementary material for: Plasma-activated CoOx nanoclusters supported on graphite intercalation compounds for improved CO2 electroreduction to formate
Source: Royal Society of Chemistry journal article supplement (doi:10.1039/c9ta08683h), 2019-01-01
Supplement: c9ta08683h1.pdf [file c9ta08683h1.pdf]

1 *Supporting Information for*

2

3 **Plasma-activated CoO<sub>x</sub> nanocluster supported on graphite**  
4 **intercalation compounds for improved CO<sub>2</sub> electroreduction**  
5 **to formate**

6

7 Qiang Zhang, Anbang He, Yong Yang, Jun Du\*, Zouhua Liu and Changyuan Tao\*

8

9 *College of Chemistry and Chemical Engineering, Chongqing University, Chongqing 400044,*  
10 *China.*

11

12 *\*Corresponding authors: College of Chemistry and Chemical Engineering, Chongqing*  
13 *University, Chongqing 401331, China.*

14 *E-mail addresses: dujune@cqu.edu.cn (Jun Du), taocy@cqu.edu.cn (Changyuan Tao).*

15

16

17 **Mailing address for correspondence:**

18 Dr. Du, Jun (Prof.)

19 College of Chemistry and Chemical Engineering, Chongqing University

20 No.55 Daxuecheng South Rd., Shapingba

21 Chongqing 401331, China

22 Tel: +86-23-625678923

23 Fax: +86-23-625678923

24 E-mail: dujune@cqu.edu.cn

25

26

1

## 2 **Electrochemical Measurements**

3 In all measurements, we used SCE as the reference electrode. For comparison with  
4 the literature, all the potentials in this paper were converted to the RHE reference:

$$5 \quad E(\text{vs. RHE}) = E(\text{vs. SCE}) + 0.24 \text{ V} + 0.059 \cdot \text{pH}$$

6 CO<sub>2</sub>ER was conducted in CO<sub>2</sub>-saturated 0.1 M KHCO<sub>3</sub> solution (pH 6.8) at room  
7 temperature and atmospheric pressure.

8

## 9 **Calculation for Activity Descriptors**

10 Faradaic efficiency (FE) of gaseous products at each applied potential was calculated  
11 based on the equation:

$$12 \quad FE = \frac{z \cdot P \cdot F \cdot V \cdot \nu_i}{R \cdot T \cdot J}$$

13 Partial current density for formate normalized by the geometrical electrode area  
14 ( $J_{\text{formate}}$ , A cm<sup>-2</sup>) was determined by calculating the total current density multiplied by  
15 FE of formate:

$$16 \quad J_{\text{formate}} = FE_{\text{formate}} \cdot J$$

17 Formate mass activity was determined by formate partial current density divided  
18 by catalyst mass on the electrode:

$$19 \quad \text{Mass activity} = \frac{J_{\text{formate}}}{m}$$

20 Formate production rate normalized by the geometrical electrode area ( $n$ ,  
21 mol·cm<sup>-2</sup>·h<sup>-1</sup>) was calculated based on the formula:

$$n = \frac{P \cdot V \cdot v_i}{R \cdot T} \times 3600$$

Turnover Frequency (TOF, h<sup>-1</sup>) for formate production per metal site is defined as the mole of formate product formed divided by the mole of Co metals in catalysts employed in the CO<sub>2</sub> electrolysis per hour, which can be obtained by following formula:

$$TOF = \frac{n \cdot M}{m \cdot \omega}$$

Where  $z$  is the number of electrons transferred per mole of gas product ( $z$  is 4 for formate),  $F$  is Faraday constant (96500 C·mol<sup>-1</sup>),  $P$  is pressure (1.01 × 10<sup>5</sup> Pa),  $V$  is the gas volumetric flow rate (3.33×10<sup>-7</sup> m<sup>3</sup>·s<sup>-1</sup>),  $v_i$  is the volume concentration of gas product determined by GC,  $T$  is the temperature (298.15 K),  $R$  is the gas constant (8.314 J mol<sup>-1</sup>·K<sup>-1</sup>),  $J$  is the steady-state current at each applied potential (A),  $m$  is the catalyst mass on the electrode (g·cm<sup>-2</sup>),  $\omega$  is the mass percentage of Co metal in the catalysts detected by EDS, and  $M$  is atomic mass of metal (g·mol<sup>-1</sup>).

To evaluate the effect of surface area, we measured the electrochemically active surface area (ECSA) for different catalysts electrodes from the electrochemical double-layer capacitance of the catalytic surface [1]. The electrochemical capacitance was determined by measuring the non-Faradaic capacitive current associated with double-layer charging from the scan-rate dependence of cyclic voltammograms (CVs). The double-layer charging current is equal to the product of the scan rate,  $\nu$ , and the electrochemical double-layer capacitance,  $C_{DL}$ , as given by the equation:

$$i_c = \nu C_{DL}$$

Thus, a plot of  $i_c$  as a function of  $\nu$  yields a straight line with a slope equal to  $C_{DL}$ . The

1 specific ECSA of the electrodes is calculated from the double layer capacitance

2 according to the equation:

3 
$$\text{ECSA} = C_{\text{DL}} / C_s$$

4 Where  $C_s$  is the specific capacitance of the sample or the capacitance of an atomically

5 smooth planar surface of the material per unit area under identical electrolyte

6 conditions. For our estimates of surface area, we use general specific capacitances of

7  $C_s = 0.020 \text{ mF}$  based on typical reported values <sup>[1]</sup>.

8

9

10

11

12

13

1

2

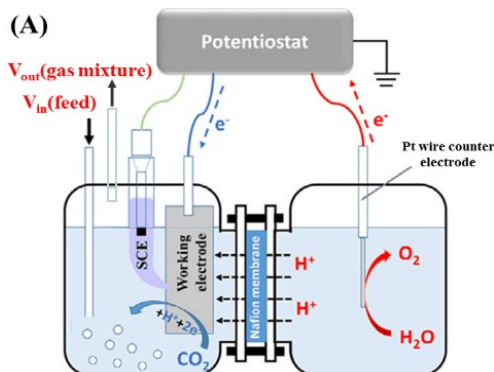

3

4 **Fig. S1** schematic diagram of the electrolytic cell configuration for the  
5 electroreduction of CO<sub>2</sub> supplied directly from the gas phase.

6

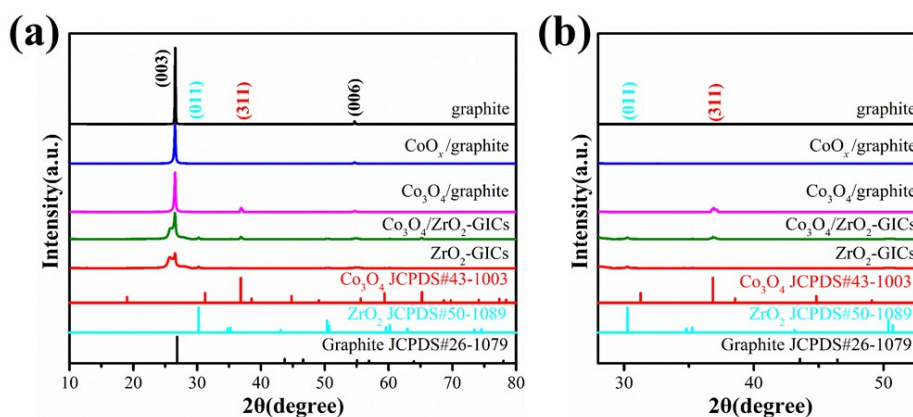

7

8 **Fig. S2** (a) XRD patterns (10~90°) of graphite, ZrO<sub>2</sub>-GICs, Co<sub>3</sub>O<sub>4</sub>/graphite,  
9 CoO<sub>x</sub>/graphite and Co<sub>3</sub>O<sub>4</sub>/ZrO<sub>2</sub>-GICs; (b) XRD patterns (28~53°) of graphite, ZrO<sub>2</sub>-  
10 GICs, Co<sub>3</sub>O<sub>4</sub>/graphite, CoO<sub>x</sub>/graphite and Co<sub>3</sub>O<sub>4</sub>/ZrO<sub>2</sub>-GICs.

11

12

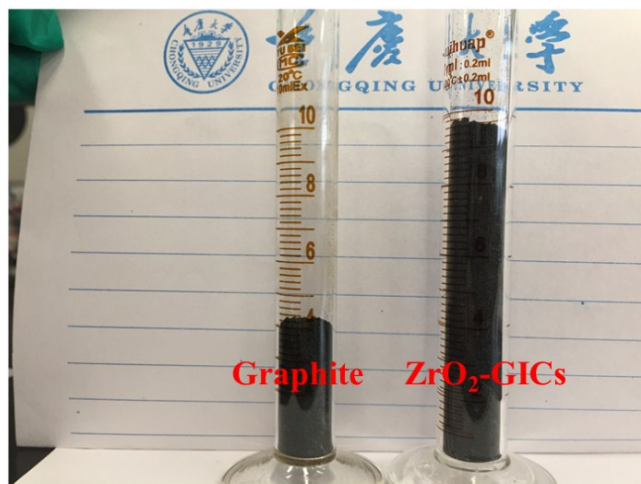

1

2 **Fig. S3** The volume of graphite and ZrO<sub>2</sub>-GICs with the same quality (0.1 g).

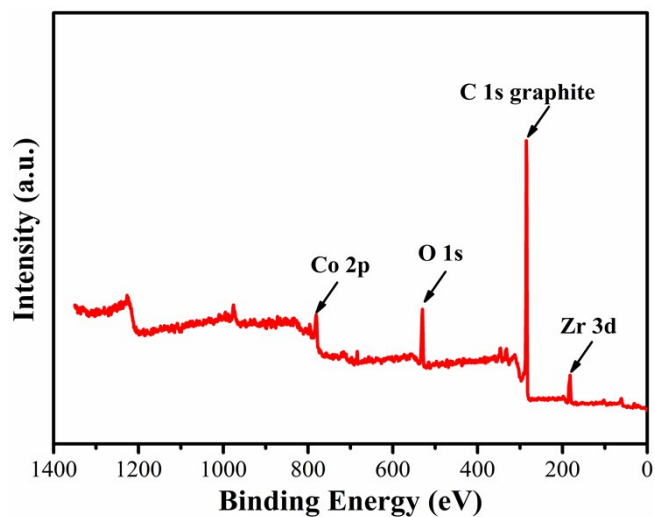

3

4

**Fig. S4** XPS survey scan of CoO<sub>x</sub>/ZrO<sub>2</sub>-GICs.

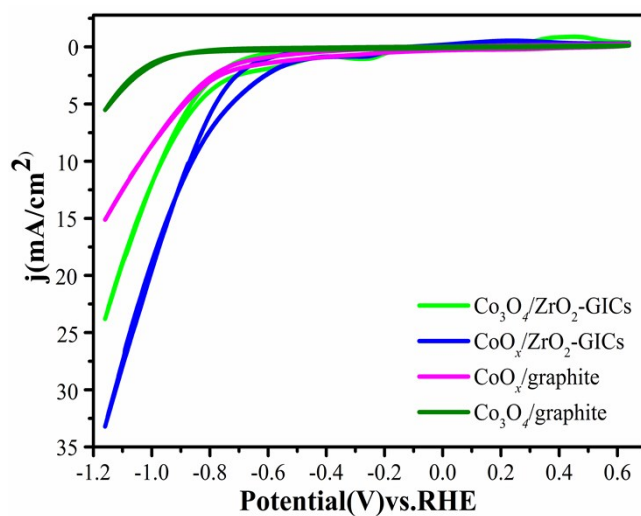

5

6 **Fig. S5** CV scans of Co<sub>3</sub>O<sub>4</sub>/graphite, CoO<sub>x</sub>/graphite, Co<sub>3</sub>O<sub>4</sub>/ZrO<sub>2</sub>-GICs and  
7 CoO<sub>x</sub>/ZrO<sub>2</sub>-GICs with CO<sub>2</sub> in 0.1 M KHCO<sub>3</sub>.

1

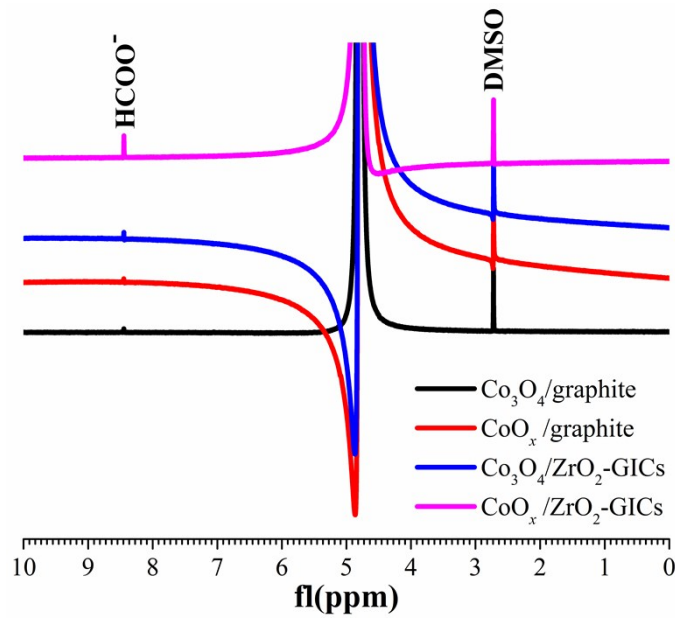

2

3

4

5

6

**Fig. S6**  $^1\text{H-NMR}$  spectra of the liquid products of  $\text{CO}_2\text{RR}$  on different catalysts at  $-0.85\text{ V vs. RHE}$  for 5h.

7

8

9

10

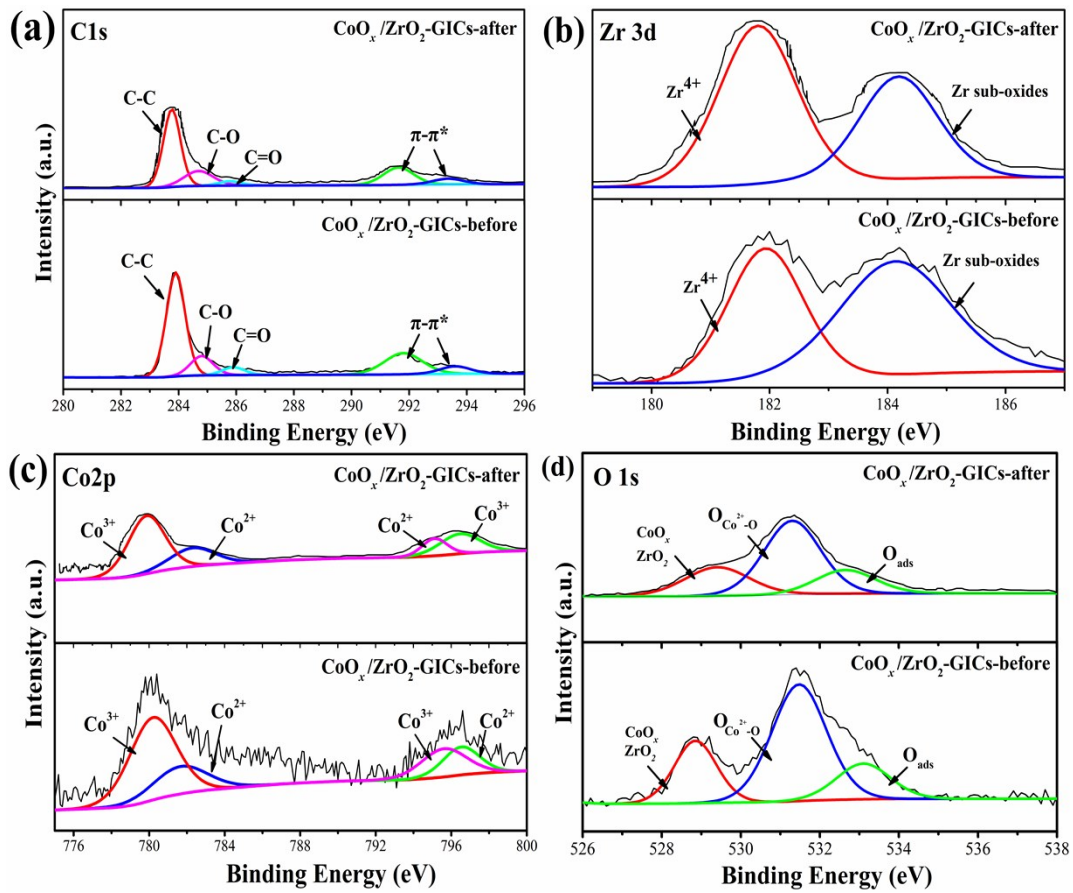

8

9

10

11

12

13

14

15

16

17

18

**Fig. S7** XPS spectrum of  $\text{CoO}_x/\text{ZrO}_2\text{-GICs}$  before and after applied potential ( $-0.85\text{ V vs. RHE}$ , continuous electrolysis for 2 h) : (a) C 1s, (b) Zr 3d, (c) Co 2p, (d) O 1s.

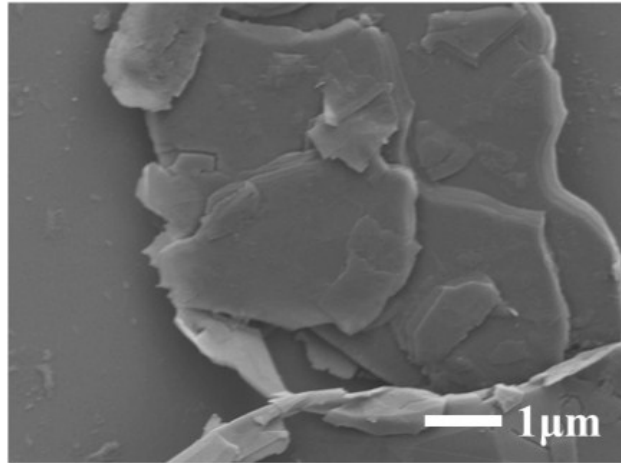

1

2

**Fig. S8** SEM image of graphite-C.

3

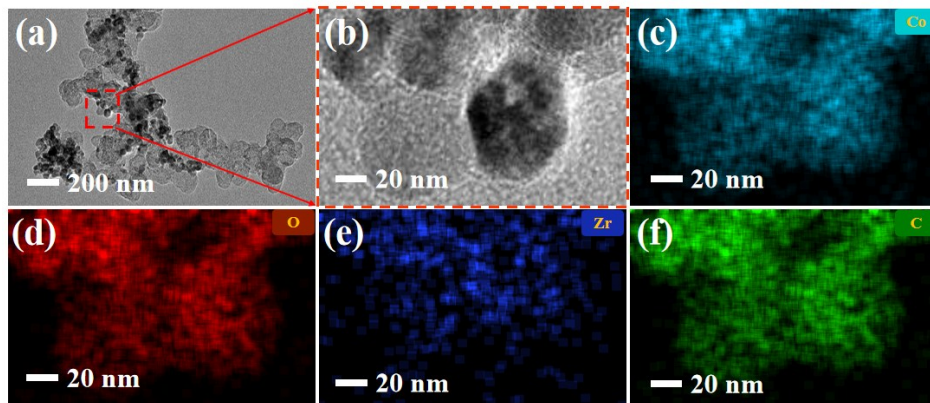

4

**Fig. S9** TEM images of CoO<sub>x</sub>/ZrO<sub>2</sub>-GICs. Element distribution mapping for (c) Co, (d)

6 O, (j) Zr, (k) C of CoO<sub>x</sub>/ZrO<sub>2</sub>-GICs.

7

8



1

2 **Table S1** Surface elemental composition and chemical state of different catalysts as  
 3 probed by XPS.

| Catalyst                                               | Co 2p (%)        |                  |                                    | O 1s (%)                                   |                  |                                                                |
|--------------------------------------------------------|------------------|------------------|------------------------------------|--------------------------------------------|------------------|----------------------------------------------------------------|
|                                                        | Co <sup>2+</sup> | Co <sup>3+</sup> | Co <sup>2+</sup> /Co <sup>3+</sup> | O <sub>latt</sub> +O <sub>low-defect</sub> | O <sub>ads</sub> | (O <sub>latt</sub> +O <sub>low-defect</sub> )/O <sub>ads</sub> |
| Co <sub>3</sub> O <sub>4</sub> /graphite               | 32.43            | 67.57            | 0.48                               | 90.78                                      | 9.22             | 9.85                                                           |
| CoO <sub>x</sub> /graphite                             | 40.12            | 59.88            | 0.67                               | 87.75                                      | 12.25            | 7.16                                                           |
| Co <sub>3</sub> O <sub>4</sub> /ZrO <sub>2</sub> -GICs | 33.77            | 66.23            | 0.51                               | 91.95                                      | 8.05             | 11.43                                                          |
| CoO <sub>x</sub> /ZrO <sub>2</sub> -GIC                | 40.83            | 59.17            | 0.69                               | 90.67                                      | 9.33             | 9.71                                                           |

4

5 **Table S2** Co<sup>2+</sup>:Co<sup>3+</sup> ratio of CoO<sub>x</sub>/ZrO<sub>2</sub>-GIC before and after applied potential (-0.35  
 6 V vs. RHE, continuous electrolysis for 2 h).

| Catalyst                                        | Co 2p (%)        |                  |                                    |
|-------------------------------------------------|------------------|------------------|------------------------------------|
|                                                 | Co <sup>2+</sup> | Co <sup>3+</sup> | Co <sup>2+</sup> /Co <sup>3+</sup> |
| CoO <sub>x</sub> /ZrO <sub>2</sub> -GIC -before | 40.8             | 59.2             | 0.69                               |
| CoO <sub>x</sub> /ZrO <sub>2</sub> -GIC-after   | 41.5             | 58.5             | 0.71                               |

7

8 **Table S3** The composition quantification of different catalysts analyzed by ICP.

| Catalyst                                               | Zr(wt.%) | Co(wt.%) | O(wt.%) | C(wt.%) |
|--------------------------------------------------------|----------|----------|---------|---------|
| Co <sub>3</sub> O <sub>4</sub> /graphite               | 0        | 3.0      | 3.6     | 93.4    |
| CoO <sub>x</sub> /graphite                             | 0        | 2.9      | 3.1     | 94.0    |
| Co <sub>3</sub> O <sub>4</sub> /ZrO <sub>2</sub> -GICs | 10.2     | 2.9      | 4.9     | 82.0    |
| CoO <sub>x</sub> /ZrO <sub>2</sub> -GICs               | 9.6      | 2.8      | 4.0     | 83.6    |

9

1  
2

3 **Table S4** Electrochemical CO<sub>2</sub>RR properties of Co-base electrocatalysts compared  
4 with other metal materials for formate production.

| Catalysts                                              |                                         | Electrolyte                                                         | Work potential            | Formate faradaic efficiency | Stability | Ref.      |
|--------------------------------------------------------|-----------------------------------------|---------------------------------------------------------------------|---------------------------|-----------------------------|-----------|-----------|
| Other metal catalysts                                  | Cu@Sn                                   | 0.1 M KHCO <sub>3</sub>                                             | -1.1 V vs. RHE            | 90.4%                       | 10 h      | 18        |
|                                                        | Bi nanoflakes                           | 0.1 M KHCO <sub>3</sub>                                             | -0.6 V vs. RHE            | 100%                        | 10 h      | 19        |
|                                                        | nano-Bi                                 | 0.5 M KHCO <sub>3</sub>                                             | -1.6 V vs. SCE            | 98.4%                       | 14 h      | 20        |
|                                                        | SnOx/AgOx                               | 0.1 M KHCO <sub>3</sub>                                             | -0.8 V vs. RHE            | ~30%                        | 20 h      | 21        |
|                                                        | Bi /Bi <sub>2</sub> O <sub>3</sub>      | 0.5 M KHCO <sub>3</sub>                                             | -0.86 V vs. RHE           | 100%                        | ~24 h     | 22        |
|                                                        | Sn-Bi                                   | 0.1 M KHCO <sub>3</sub>                                             | -1.1 V vs. RHE            | 96%                         | 100 h     | 23        |
|                                                        | sub-2 nm SnO <sub>2</sub> Quantum Wires | 0.1 M KHCO <sub>3</sub>                                             | -0.956 V vs. RHE          | 74.04%                      | 7 h       | 24        |
|                                                        | Bi <sub>2</sub> O <sub>3</sub> NSs@MCCM | 0.1 M KHCO <sub>3</sub>                                             | -0.956 V vs. RHE          | 73.6%                       | 12 h      | 25        |
|                                                        | Mo@NG-2                                 | saturated KCl solution                                              | -1.4 V vs. RHE            | 29%                         | ~76 h     | 26        |
|                                                        | Co-based catalysts                      | Ultrathin Co <sub>3</sub> O <sub>4</sub> layers                     | 0.1 M KHCO <sub>3</sub>   | -0.24 V vs. RHE             | 60%       | 20 h      |
| V <sub>o</sub> -rich Co <sub>3</sub> O <sub>4</sub>    |                                         | 0.1 M KHCO <sub>3</sub>                                             | -0.23 V vs. RHE           | 85%                         | 40 h      | 17        |
| Co <sub>3</sub> O <sub>4</sub> nanofibers              |                                         | 0.1M TBAPF <sub>6</sub> in CAN + 1%vol H <sub>2</sub> O             | -1.5 V vs. NHE            | 27%                         | 8 h       | 27        |
| Molecular Co complexes                                 |                                         | 0.5 M KHCO <sub>3</sub>                                             | -2 V vs. Fc <sup>+0</sup> | 90%                         | ~1 h      | 28        |
| Cobalt protoporphyrin                                  |                                         | 0.1 M HClO <sub>4</sub>                                             | -0.6 V vs. RHE            | N.A.                        | 1 h       | 29        |
| Atomic Cobalt layers                                   |                                         | 0.1 M Na <sub>2</sub> SO <sub>4</sub>                               | -0.85 V vs. SCE           | 90%                         | 60 h      | 30        |
| Co <sub>3</sub> O <sub>4</sub> nitrogen doped graphene |                                         | 0.1 M KHCO <sub>3</sub>                                             | -0.95 V vs. SCE           | 83%                         | 8 h       | 31        |
| Cu-Co nanoparticles                                    |                                         | 0.1 M KHCO <sub>3</sub>                                             | -1.1 V vs. RHE            | 10%                         | N.A.      | 32        |
| Co complex                                             |                                         | 0.1 M <i>n</i> Bu <sub>4</sub> NPF <sub>6</sub> /CH <sub>3</sub> CN | -1.05 V vs. NHE           | 80%                         | ~9 h      | 33        |
| CoO <sub>x</sub> /ZrO <sub>2</sub> -GICs               |                                         | 0.1 M KHCO <sub>3</sub>                                             | -0.35 V vs. RHE           | 98.4%                       | 60 h      | This work |

5  
6

## References

- [1] G. Passard, A.M. Ullman, C.N. Brodsky, D.G. Nocera, *J. Am. Chem. Soc.* 138 (2016) 2925-2928.
